# Supplementary material for: A Fast EM Algorithm for BayesA-Like Prediction of Genomic Breeding Values
Source: PLOS journal article supplement (doi:10.1371/journal.pone.0049157), 2012-11-09
Supplement: S1 (10.1371/journal.pone.0049157.s001) [file journal.pone.0049157.s001]

## Appendix S1 Expectation of the reciprocal of a scaled inverse Chi-square random variable

Given that

$$\gamma_j | \sigma_j^2 \sim N(0, \sigma_j^2)$$

and

$$\sigma_j^2 \sim \frac{\nu_\gamma S_\gamma^2}{\chi_{\nu_\gamma}^2},$$

The joint distribution of  $\gamma_j$  and  $\sigma_j^2$  is

$$\begin{aligned} p(\gamma_j, \sigma_j^2) &\propto \exp\left(-\frac{\nu_\gamma S_\gamma^2}{2\sigma_j^2}\right) (\sigma_j^2)^{-(1+\frac{\nu_\gamma}{2})} \cdot (\sigma_j^2)^{-\frac{1}{2}} \exp\left(-\frac{\gamma_j^2}{2\sigma_j^2}\right) \\ &\propto \exp\left(-\frac{\nu_\gamma S_\gamma^2 + \gamma_j^2}{2\sigma_j^2}\right) (\sigma_j^2)^{-(1+\frac{\nu_\gamma+1}{2})}. \end{aligned}$$

This is the kernel of the conditional distribution of  $\sigma_j^2$  given  $\gamma_j$ , which is a scaled inverse Chi-square distribution with degrees of freedom  $\nu_\gamma + 1$  and scale parameter  $\frac{\gamma_j^2 + \nu_\gamma S_\gamma^2}{\nu_\gamma + 1}$ .

To show that

$$\mathbb{E}_{\sigma^2 | \mathbf{y}, \gamma = \hat{\gamma}^{(k)}} \left( \frac{1}{\sigma_j^2} \right) = \left( \frac{\{\hat{\gamma}_j^{(k)}\}^2 + \nu_\gamma S_\gamma^2}{\nu_\gamma + 1} \right)^{-1},$$

it suffices to show that the expectation of the reciprocal of a scaled inverse Chi-square variable is the reciprocal of its scale parameter. Suppose  $X$  is a scaled inverse Chi-square random variable with degrees of freedom  $\nu$  and scale parameter  $S^2$ , the probability density function for  $X$  is given by

$$p(x | \nu, S^2) = \frac{\left(\frac{\nu S^2}{2}\right)^{\frac{\nu}{2}}}{\Gamma\left(\frac{\nu}{2}\right)} \cdot \frac{\exp\left(-\frac{\nu S^2}{2x}\right)}{x^{1+\frac{\nu}{2}}}.$$

It follows that the probability density function for  $Y = \frac{1}{X}$  is

$$\begin{aligned} p(y | \nu, S^2) &= \frac{\left(\frac{\nu S^2}{2}\right)^{\frac{\nu}{2}}}{\Gamma\left(\frac{\nu}{2}\right)} \cdot \frac{\exp\left(-\frac{\nu S^2}{2} y\right)}{\left(\frac{1}{y}\right)^{1+\frac{\nu}{2}}} \cdot \left| -\frac{1}{y^2} \right| \\ &= \frac{\left(\frac{\nu S^2}{2}\right)^{\frac{\nu}{2}}}{\Gamma\left(\frac{\nu}{2}\right)} \cdot \exp\left(-\frac{\nu S^2}{2} y\right) \cdot y^{\frac{\nu}{2}-1}. \end{aligned}$$

This is the probability density function of Gamma distribution with shape parameter  $\frac{\nu}{2}$  and rate parameter  $\frac{\nu S^2}{2}$ . The expectation of Gamma distribution is the shape over rate and therefore the expectation of  $\frac{1}{X}$  is  $\frac{2}{S^2}$ .
